# Supplementary material for: Prevalence and determinants of inappropriate antibiotic dispensing at private drug retail outlets in urban and rural areas of Indonesia: a mixed methods study
Source: PubMed Central journal article supplement — BMJ Glob Health. 2021 Aug 3;6(8):e004993. doi: 10.1136/bmjgh-2021-004993 (PMC8336216; doi:10.1136/bmjgh-2021-004993), 2021-08-03
Supplement: bmjgh-2021-004993supp001.pdf [file bmjgh-2021-004993supp001.pdf]

## Supplement 1. Predictors of dispensing antibiotics without a prescription for diarrhoea cases

| Predictors                                                            | Interactions                                                                      |                                             | Univariate analysis |                  | Multivariate analysis |                  |
|-----------------------------------------------------------------------|-----------------------------------------------------------------------------------|---------------------------------------------|---------------------|------------------|-----------------------|------------------|
|                                                                       | Number of interactions in which antibiotic was dispensed<br><br>n (%)<br><br>N=78 | Total number of interactions<br><br>N = 165 | OR (95% CI)         | P value          | OR (95% CI)           | P value          |
| District                                                              |                                                                                   |                                             |                     |                  |                       |                  |
| Tabalong (rural district)                                             | 19 (38.8%)                                                                        | 49                                          | 1                   |                  |                       |                  |
| Bekasi (urban district)                                               | 59 (50.9%)                                                                        | 116                                         | 1.0 (1.0 -1.0)      | 0.157            |                       |                  |
| Type of drug outlets                                                  |                                                                                   |                                             |                     |                  |                       |                  |
| Drugstore                                                             | 9 (20%)                                                                           | 45                                          | 1                   |                  |                       |                  |
| Pharmacy attached to GP/specialist clinics                            | 18 (42.9%)                                                                        | 42                                          | 3.0 (1.2 – 7.8)     | <b>0.024</b>     | 3.0 (1.2 – 7.8)       | <b>0.024</b>     |
| Standalone pharmacy                                                   | 51 (65.4%)                                                                        | 78                                          | 7.6 (3.2 – 18.0)    | <b>&lt;0.001</b> | 7.6 (3.2 – 18.0)      | <b>&lt;0.001</b> |
| If a pharmacist or pharmacy technician was available during the visit |                                                                                   |                                             |                     |                  |                       |                  |
| Yes                                                                   | 24 (45.3%)                                                                        | 53                                          | 1                   |                  |                       |                  |
| No or don't know                                                      | 54 (48.2%)                                                                        | 112                                         | 1.1 (0.6 – 2.2)     | 0.725            |                       |                  |

| Predictors                  | Interactions                                                                      |                                             | Univariate analysis |         | Multivariate analysis |         |
|-----------------------------|-----------------------------------------------------------------------------------|---------------------------------------------|---------------------|---------|-----------------------|---------|
|                             | Number of interactions in which antibiotic was dispensed<br><br>n (%)<br><br>N=78 | Total number of interactions<br><br>N = 165 | OR (95% CI)         | P value | OR (95% CI)           | P value |
| Gender of drug outlet staff |                                                                                   |                                             |                     |         |                       |         |
| Female                      | 60 (49.2%)                                                                        | 122                                         | 1.3 (0.7 – 2.7)     | 0.409   |                       |         |
| Male                        | 18 (41.9%)                                                                        | 43                                          | 1                   |         |                       |         |
| Day or night visit          |                                                                                   |                                             |                     |         |                       |         |
| Day visit                   | 52 (44.4%)                                                                        | 117                                         | 1                   |         |                       |         |
| Night visit                 | 26 (54.2%)                                                                        | 48                                          | 1.5 (0.8 – 2.9)     | 0.257   |                       |         |

Model gave a sensitivity of 0.65, a specificity of 0.69, a positive predictive value of 0.65 and a negative predictive value of 0.69. Goodness of fit was not assessable as only a single variable remained in multivariate model.

**Supplement 2. Predictors of dispensing antibiotics without a prescription for suspected TB cases**

| Predictors                                                            | Interactions                                                                       |                                             | Univariate analysis |              | Multivariate analysis |              |
|-----------------------------------------------------------------------|------------------------------------------------------------------------------------|---------------------------------------------|---------------------|--------------|-----------------------|--------------|
|                                                                       | Number of interactions in which antibiotic was dispensed<br><br>n (%)<br><br>N=133 | Total number of interactions<br><br>N = 165 | OR (95% CI)         | P value      | OR (95% CI)           | P value      |
| District                                                              |                                                                                    |                                             |                     |              |                       |              |
| Tabalong (rural district)                                             | 38 (77.6%)                                                                         | 49                                          | 1                   |              |                       |              |
| Bekasi (urban district)                                               | 95 (81.9%)                                                                         | 116                                         | 1.0 (1.0 – 1.0)     | 0.520        |                       |              |
| Type of drug outlets                                                  |                                                                                    |                                             |                     |              |                       |              |
| Drugstore                                                             | 29 (66.0%)                                                                         | 44                                          | 1                   |              | 1                     |              |
| Pharmacy attached to GP/specialist clinics                            | 31 (73.8%)                                                                         | 42                                          | 1.5 (0.6 – 3.8)     | 0.416        | 1.5 (0.6 – 3.8)       | 0.416        |
| Standalone pharmacy                                                   | 73 (92.4%)                                                                         | 79                                          | 6.8 (2.2 – 21.5)    | <b>0.001</b> | 6.8 (2.2 – 21.5)      | <b>0.001</b> |
| If a pharmacist or pharmacy technician was available during the visit |                                                                                    |                                             |                     |              |                       |              |
| Yes                                                                   | 32 (72.7%)                                                                         | 44                                          | 1                   |              |                       |              |
| No or don't know                                                      | 101 (83.5%)                                                                        | 121                                         | 1.9 (0.8 – 4.3)     | 0.126        |                       |              |
| Gender of drug outlet staff                                           |                                                                                    |                                             |                     |              |                       |              |

| Predictors         | Interactions                                                                       |                                             | Univariate analysis |         | Multivariate analysis |         |
|--------------------|------------------------------------------------------------------------------------|---------------------------------------------|---------------------|---------|-----------------------|---------|
|                    | Number of interactions in which antibiotic was dispensed<br><br>n (%)<br><br>N=133 | Total number of interactions<br><br>N = 165 | OR (95% CI)         | P value | OR (95% CI)           | P value |
| Female             | 104 (81.3%)                                                                        | 128                                         | 1.2 (0.5 – 2.9)     | 0.697   |                       |         |
| Male               | 29 (78.4%)                                                                         | 37                                          | 1                   |         |                       |         |
| Day or night visit |                                                                                    |                                             |                     |         |                       |         |
| Day visit          | 84 (78.5%)                                                                         | 107                                         | 1                   |         |                       |         |
| Night visit        | 49 (84.5%)                                                                         | 58                                          | 1.5 (0.6 – 3.5)     | 0.356   |                       |         |

Model gave a sensitivity of 0.55, a specificity of 0.81, a positive predictive value of 0.92, and a negative predictive value of 0.30. Goodness of fit was not assessable as only a single variable remained in multivariate model.

## Supplement 3. Predictors of dispensing antibiotics without a prescription for URTI cases

| Predictors                                                            | Interactions                                                                       |                                             | Univariate analysis |              | Multivariate analysis |              |
|-----------------------------------------------------------------------|------------------------------------------------------------------------------------|---------------------------------------------|---------------------|--------------|-----------------------|--------------|
|                                                                       | Number of interactions in which antibiotic was dispensed<br><br>n (%)<br><br>N=131 | Total number of interactions<br><br>N = 165 | OR (95% CI)         | P value      | OR (95% CI)           | P value      |
| District                                                              |                                                                                    |                                             |                     |              |                       |              |
| Tabalong (rural district)                                             | 42 (85.7%)                                                                         | 49                                          | 1                   |              |                       |              |
| Bekasi (urban district)                                               | 89 (76.7%)                                                                         | 116                                         | 1.0 (0.9 – 1.0)     | 0.196        |                       |              |
| Type of drug outlets                                                  |                                                                                    |                                             |                     |              |                       |              |
| Drugstore                                                             | 29 (65.9%)                                                                         | 44                                          | 1                   |              |                       |              |
| Pharmacy attached to GP/specialist clinics                            | 34 (81.0%)                                                                         | 42                                          | 2.9 (1.0 – 8.6)     | 0.055        | 2.9 (1.0 – 8.6)       | 0.055        |
| Standalone pharmacy                                                   | 68 (86.1%)                                                                         | 79                                          | 5.9 (1.9 – 18.2)    | <b>0.002</b> | 5.9 (1.9 – 18.2)      | <b>0.002</b> |
| If a pharmacist or pharmacy technician was available during the visit |                                                                                    |                                             |                     |              |                       |              |
| Yes                                                                   | 42 (77.8%)                                                                         | 54                                          | 1                   |              |                       |              |
| No or don't know                                                      | 89 (80.2%)                                                                         | 111                                         | 1.1 (0.5 – 2.6)     | 0.772        |                       |              |
| Gender of drug outlet staff                                           |                                                                                    |                                             |                     |              |                       |              |

| Predictors         | Interactions                                                                       |                                             | Univariate analysis |         | Multivariate analysis |         |
|--------------------|------------------------------------------------------------------------------------|---------------------------------------------|---------------------|---------|-----------------------|---------|
|                    | Number of interactions in which antibiotic was dispensed<br><br>n (%)<br><br>N=131 | Total number of interactions<br><br>N = 165 | OR (95% CI)         | P value | OR (95% CI)           | P value |
| Female             | 100 (80.0%)                                                                        | 125                                         | 1.2 (0.5 – 3.0)     | 0.674   |                       |         |
| Male               | 31 (77.5%)                                                                         | 40                                          | 1                   |         |                       |         |
| Day or night visit |                                                                                    |                                             |                     |         |                       |         |
| Day visit          | 89 (80.2%)                                                                         | 111                                         | 1                   |         |                       |         |
| Night visit        | 42 (77.8%)                                                                         | 54                                          | 0.8 (0.4 – 1.9)     | 0.675   |                       |         |

Model gave a sensitivity of 0.78, a specificity of 0.44, a positive predictive value of 0.84 and a negative predictive value of 0.34. Goodness of fit was not assessable as only a single variable remained in multivariate model.
